# Supplementary material for: A survey of U.S. public perspectives on facial recognition technology and facial imaging data practices in health and research contexts
Source: PLoS One. 2021 Oct 14;16(10):e0257923. doi: 10.1371/journal.pone.0257923 (PMC8516205; doi:10.1371/journal.pone.0257923)
Supplement: S2 File — The statistical test results performed on the survey responses are displayed. (XLSX) [file pone.0257923.s002.xlsx]

## Sheet: R_Q19(S_Q22_9-16) summary
			Hospitals checking surgical patients’ identities to avoid medical errors	Hospitals tracking who enters or leaves their buildings to assess potential security threats	Hospitals identifying patients who are nonresponsive, unaccompanied, or otherwise without identification to enable continuity of care	Healthcare providers trying to diagnose certain conditions and diseases earlier, faster, or better	Healthcare providers monitoring patients’ emotions or symptoms	Pharmacies assessing threats of insurance fraud or identity theft when prescriptions are filled	Hospitals or clinics verifying staff identities for access to electronic health records, prescriptions, or building access	Scientists linking diverse data sources to conduct health research
Sample count	0	Unacceptable	602	741	656	667	968	858	678	860
	1	Not Sure	725	907	766	882	1036	993	759	1202
	2	Acceptable	2560	2246	2462	2351	1879	2016	2453	1793
		total	3887	3894	3884	3900	3883	3867	3890	3855
	Missig	No answer	161	154	164	148	165	181	158	193
	Wilcoxon sign rank	Statistic	4048640	3355524	3839489	3548834	2675696	2898000	3841398	2379311
		p-value	1.2e-265	6.31e-167	1.74e-229	2.36e-206	2.33e-65	1.77e-103	7.8e-221	2.47e-73
		Effsize	0.558502	0.441287	0.518967	0.490851	0.273994	0.347359	0.508607	0.291743
		Magnitude	large	moderate	large	moderate	small	moderate	large	small
		sign	+	+	+	+	+	+	+	+
Kruskal–Wallis test		Group #	effect size
age		7	small	small	small	small	small	small	small	NS
region		5	NS	NS	NS	NS	small	NS	NS	NS
race2		6	small	small	small	small	NS	NS	small	NS
sex1		3	small	NS	small	small	NS	NS	small	small
edu		5	small	small	small	small	small	small	small	small
income		6	small	small	small	small	small	small	small	small
political		3	small	NS	small	small	small	NS	small	small
prov_dna		3	NS	small	small	small	small	NS	small	small
mri_exp		3	small	small	small	small	small	small	small	small
NS = Not statistically significant.
Effect size r for Wilcox sign rank test: small = 0.10 < 0.29; Moderate = 0.30 < 0.49; Large = > 0.49
Effect size e2 for Kruskal–Wallis test: Small = 0.01 < 0.079; Moderate = 0.08 < 0.259; Large = > 0.259
Sign for Wicoxon Test: + indicates a bias in the distribution toward less concerned; - indicates a bias in the distribution toward more concerned

## Sheet: R_Q21 summary
			Video	2-Dimensional photo	3-Dimensional photo	MRI scan image	CT scan image	Geometric surface/Texture map	Imaging data (that is, measurements but not the images themselves)
	Rating	Coding	N
Sample count	Very concerned	0	690	476	566	475	479	403	397
	Somewhat concerned	1	739	772	695	596	582	617	556
	Not Sure	2	123	116	118	128	138	177	197
	Not too concerned	3	374	525	493	525	545	547	542
	Not at all concerned	4	84	121	138	286	266	266	318
		total	2010	2010	2010	2010	2010	2010	2010
Wilcoxon sign rank		Test statistic	334360	533841	505678	724097	706380	717362	760837
		p-value	5.95e-131	1.55e-57	3.7e-65	1.11e-12	4.5e-14	1.61e-08	0.0043
		Effect size	0.543695	0.35479	0.377887	0.157558	0.165443	0.124888	0.0621081
		Magnitude	large	moderate	moderate	small	small	small	small
		Sign	-	-	-	-	-	-	-
Kruskal–Wallis test		Covariate	effect size
		Age	small	small	small	small	small	small	small
		Region	small	NS	small	NS	NS	NS	NS
		Race	NS	NS	NS	NS	NS	NS	NS
		Sex/Gender	small	NS	NS	small	small	NS	small
		Education	small	small	small	small	small	small	small
		Income	small	NS	small	small	small	NS	small
		Political philosophy	small	small	small	small	NS	small	NS
		DNA experience	small	small	small	small	small	small	small
		Imaging experience	small	small	small	NS	NS	small	NS
NS = Not statistically significant.
Effect size r for Wilcox sign rank test: small = 0.10 < 0.29; Moderate = 0.30 < 0.49; Large = > 0.49
Effect size e2 for Kruskal–Wallis test: Small = 0.01 < 0.079; Moderate = 0.08 < 0.259; Large = > 0.259
Sign for Wicoxon Test: + indicates a bias in the distribution toward less concerned; - indicates a bias in the distribution toward more concerned

## Sheet: R_Q22 summary
			Take part in the study
	Rating	Coding	N
Sample count	No, definitely not	0	287
	No, probably not	1	318
	Not sure	2	609
	Yes, probably	3	561
	Yes, definitely	4	235
		total	2010
Wilcoxon sign rank		Test statistic	514858
		p-value	0.102
		Effect size	0.0721984
		Magnitude	small
		Sign	+
Kruskal–Wallis test		Covariate	effect size
		Age	small
		Region	small
		Race	small
		Sex/Gender	small
		Education	small
		Income	small
		Political philosophy	small
		DNA experience	small
		Imaging experience	small
NS = Not statistically significant.
Effect size r for Wilcox sign rank test: small = 0.10 < 0.29; Moderate = 0.30 < 0.49; Large = > 0.49
Effect size e2 for Kruskal–Wallis test: Small = 0.01 < 0.079; Moderate = 0.08 < 0.259; Large = > 0.259
Sign for Wicoxon Test: + indicates a bias in the distribution toward more participation; - indicates a bias in the distribution toward less participation

## Sheet: R_Q23 summary
			Medical records	DNA sample	Facial images
Sample count	Comfort level	Coding	N
	Not at all comfortable	0	236	320	274
	Not very comfortable	1	493	550	555
	Somewhat comfortable	2	753	740	742
	Very comfortable	3	528	400	439
		total	2010	2010	2010
Wilcoxon sign rank test		Test statistic	1.32934e+06	1137870	1207664
		p-value	4.25e-37	3.49e-07	3.01e-15
		Effect size	0.283851	0.11364	0.175996
		Magnitude	small	small	small
		Sign	+	+	+
Kruskal–Wallis test		Covariate	Effect size
		Age	small	small	small
		Region	NS	NS	small
		Race	small	small	small
		Sex/Gender	small	small	small
		Education	small	small	small
		Income	small	small	small
		Political philosophy	small	small	small
		DNA experience	small	small	small
		Imaging experience	small	small	small
NS = Not statistically significant.
Effect size r for Wilcox sign rank test: small = 0.10 < 0.29; Moderate = 0.30 < 0.49; Large = > 0.49
Effect size e2 for Kruskal–Wallis test: Small = 0.01 < 0.079; Moderate = 0.08 < 0.259; Large = > 0.259
Sign for Wicoxon Test: + indicates a bias in the distribution toward more comfort; - indicates a bias in the distribution toward less comfort

## Sheet: R_Q24 summary
privacy concerns	Count		Pearson's Chi-squared test	Covariate	Chi-squared	df	p-value	Effect size(Cramer’s V )
I am EQUALLY worried about the privacy of my medical records, DNA, facial images, and related information.	1116 (55.5%)			Age	32.2207	18	0.0207001	small
I am MORE worried about the privacy of my MEDICAL RECORDS than I am my DNA, facial images, and related information.	357 (17.8%)			Region	15.8609	12	NS
I am MORE worried about the privacy of my DNA than I am my medical records, facial images, and related information.	132 (6.6%)			Race	29.5432	15	0.0136795	small
I am MORE worried about the privacy of my FACIAL IMAGES than I am my medical records, DNA, and related information.	405 (20.1%)			Sex/Gender	17.6875	6	0.0070625	small
Total	2010			Education	8.10072	12	NS
				Income	19.6474	15	NS
				Political philosophy	13.8389	6	0.0314884	small
				DNA experience	19.4971	6	0.00340152	small
				Imaging experience	17.1137	6	0.00887444	small
			NS = Not statistically significant.

## Sheet: R_Q25 summary
opt-out of sharing	Count		Pearson's Chi-squared test	Covariate	Chi-squared	df	p-value	Effect size(Cramer’s V )
I would participate fully and allow all of my health information, DNA information, and facial imaging information to be used for the research.	838 (41.7%)			Age	71.7761	18	2.25701e-08	small
I would opt-out of DNA information even though that will limit the value of my data for research.	498 (24.8%)			Region	9.89754	12	NS
I would opt-out of facial imaging information, even though that will limit the value of my data for research.	232 (11.5%)			Race	67.1765	15	1.41505e-08	small
I would opt-out of both DNA information and facial imaging information, even though that will limit the value of my data for research.	442 (22%)			Sex/Gender	45.8885	6	3.11584e-08	small
Total	2010			Education	77.5011	12	1.23387e-11	small
				Income	68.072	15	9.8276e-09	small
				Political philosophy	30.1361	6	3.70336e-05	small
				DNA experience	105.507	6	1.77585e-20	small
				Imaging experience	24.4319	6	0.00043484	small
			NS = Not statistically significant.

## Sheet: R_Q26 summary
Pay opt-out	Count		Pearson's Chi-squared test	Covariate	Chi-squared	df	p-value	Effect size(Cramer’s V )
I would participate fully and allow all of my health information, DNA information, and facial imaging information to be used for the research.	827 (70.6.7%)			Age	80.8433	6	2.39206e-15	small
I would opt-out of DNA information even though that will limit the value of my data for research.	345 (29.4%)			Region	9.83298	4	0.0433371	small
Total	1172			Race	21.5893	5	0.000626571	small
				Sex/Gender	8.83603	2	0.0120582	small
				Education	39.7374	4	4.90484e-08	small
				Income	26.1734	5	8.25836e-05	small
				Political philosophy	15.3095	2	0.000473779	small
				DNA experience	62.004	2	3.43553e-14	small
				Imaging experience	4.68918	2	NS
			NS = Not statistically significant.

## Sheet: R_Q27 summary
			Take part in the study
	Rating	Coding	N
Sample count	RESTRICTED	0	741
	CONTROLLED	1	870
	UNRESTRICTED	2	399
		total	2010
Wilcoxon sign rank		Test statistic	227630
		p-value	4.1e-24
		Effect size	0.225931
		Magnitude	small
		Sign	-
Kruskal–Wallis test		Covariate	effect size
		Age	small
		Region	small
		Race	small
		Sex/Gender	small
		Education	small
		Income	small
		Political philosophy	small
		DNA experience	small
		Imaging experience	small
NS = Not statistically significant.
Effect size r for Wilcox sign rank test: small = 0.10 < 0.29; Moderate = 0.30 < 0.49; Large = > 0.49
Effect size e2 for Kruskal–Wallis test: Small = 0.01 < 0.079; Moderate = 0.08 < 0.259; Large = > 0.259
Sign for Wicoxon Test: + indicates a bias in the distribution toward less concerned; - indicates a bias in the distribution toward more concerned

## Sheet: corr Q27.Q22 and Q20.Q21 
Polychoric Correlation for ordinal variables
#Q27 affects response to Q22
		Q22
		Partispation
		corr	p-value
Q27	Resouces	0.33413	1.27922e-53
Q22 coding			Q27 coding
No, definitely not	0		RESTRICTED	0
No, probably not	1		CONTROLLED	1
Not sure	2		UNRESTRICTED	2
Yes, probably	3
Yes, definitely	4
#Q20 (effectiveness of FRT) affects response to Q21
	Polychoric Correlation									P-value
		Q20									Q20
		identifying	assessing_sex	assessing_race	detecting_emotions	diagnosing_medical	sum Q20				identifying	assessing_sex	assessing_race	detecting_emotions	diagnosing_medical	sum Q20
Q21	Video	-0.251467	-0.110992	-0.135303	-0.141356	-0.137988	-0.204376		Q21	Video	1.2399e-28	1.8429e-06	4.80972e-09	1.34664e-09	3.82739e-09	2.14337e-20
	2-Dimensional photo	-0.102047	-0.118587	-0.0894415	-0.100504	-0.114172	-0.134868			2-Dimensional photo	8.83453e-06	3.42192e-07	0.000113647	1.71463e-05	1.13179e-06	1.27477e-09
	3-Dimensional photo	-0.109658	-0.056552	-0.0913191	-0.0771508	-0.0790807	-0.122811			3-Dimensional photo	1.77671e-06	0.0153175	8.12129e-05	0.000978172	0.000764043	3.32351e-08
	MRI scan image	-0.0969801	-0.119772	-0.126329	-0.154039	-0.15492	-0.16542			MRI scan image	2.41955e-05	2.60623e-07	4.70503e-08	3.79328e-11	3.52592e-11	8.44937e-14
	CT scan image	-0.116328	-0.119938	-0.0835426	-0.119622	-0.124002	-0.149222			CT scan image	3.98261e-07	2.50832e-07	0.000313389	3.01759e-07	1.22709e-07	1.77286e-11
	Geometric surface/Texture map	-0.10336	-0.112008	-0.0863956	-0.102155	-0.113225	-0.120642			Geometric surface/Texture map	6.75186e-06	1.48011e-06	0.000193386	1.24182e-05	1.3889e-06	5.78885e-08
	Imaging data (that is, measurements but not the images themselves)	-0.152509	-0.102612	-0.113436	-0.145809	-0.178961	-0.164448			Imaging data (that is, measurements but not the images themselves)	2.68162e-11	1.04422e-05	9.54296e-07	3.98187e-10	1.77141e-14	1.18298e-13
	sum Q21	-0.145274	-0.118272	-0.117133	-0.139695	-0.149631	-0.173692			sum Q21	2.24599e-10	3.67694e-07	4.15686e-07	2.10097e-09	1.61564e-10	4.43516e-15
Q21 coding			Q20 coding
Very concerned	0		Not effective at all	0
Somewhat concerned	1		Not too effective	1
Not Sure	2		Somewhat effective	2
Not too concerned	3		Very effective	3
Not at all concerned	4

## Sheet: corr Q10. Q21 and Q23c 
#Q10 affects response to Q21
	Polychoric Correlation
		Q10
		mri
		corr	P-value
Q21	Video	-0.0957724	1.7004e-05
	2-Dimensional photo	-0.0521442	0.0193914
	3-Dimensional photo	-0.079771	0.000343781
	MRI scan image	-0.0322429	0.148451
	CT scan image	-0.0344675	0.122399
	Geometric surface/Texture map	-0.0690766	0.0019438
	Imaging data (that is, measurements but not the images themselves)	-0.0541517	0.0151799
	sum Q21	-0.0622906	0.00521165
#Q10 affects response to Q23c
	Polychoric Correlation
		Q10
		mri
		corr	P-value
Q23c	Facial	0.204527	2.00754e-20
Q10 coding			Q21 coding			Q23c coding
No	0		Very concerned	0		Not at all comfortable	0
Not Sure	1		Somewhat concerned	1		Not very comfortable	1
Yes	2		Not Sure	2		Somewhat comfortable	2
			Not too concerned	3		Very comfortable	3
			Not at all concerned	4

[truncated: 2 more sheets: Q12 and  Q24, corr Q16.Q23c and Q17.Q23b]
